# Supplementary material
Source: publisher figshare collection journal article supplement (https://wiley.figshare.com/articles/dataset/_/3573936)
Supplement: Supplementary file 1 [file 1 › appendix-B.htm]

Ecological Archives M075-010-A2


### *Ecological Archives* M075-010-A2

### **T. Royama. 2005. Moran effect on nonlinear population processes. *Ecological Monographs* 75:277–293.**

Appendix B. Autocorrelation
for *u’t*, an estimator of *ut* by the moving-average
method. A pdf
file of this appendix is also available.

Figure A2 (see Appendix A) shows the sample autocorrelation
functions, *ruu*(*l*) and *ru’u’*(*l*),
for the density-independent influence *ut* and its estimator
*u’t* (Fig. 6b). The *ruu*(*l*), as samples
of *ruu*(*l*) º 0, *l*  > 0, are insignificantly different
from zero at all lags shown, whereas the *ru’u’*(*l*) exhibit
a significant negative spike at lag 2, which can be explained as follows.

Consider that the series {*Rt*}
is made up of two components: a low-frequency cycle (*gt*, say)
due to the autocorrelated density-dependent process and a rapid fluctuation
(about the cycle) due to the density-independent influence *ut*
with no autocorrelation. Thus, we may write

|  |  |
| --- | --- |
| *Rt* = *gt* + *ut*. | (A.2) |

After the moving-average transformation
on both sides of (A2), we have

|  |  |
| --- | --- |
| *R’t* = *g’t* + *u”t* | (A.3) |

in which the single and double primes
indicate the moving-average transformations of the respective letters in Eq.
A.2. Recalling the definition *u’t* = *Rt* - *R’t* in the main text, the
difference (A.2) - (A.3) yields

|  |
| --- |
| *gt* - *g’t* + *ut* - *u”t*  = *u’t*. |

Now that, by assumption, *gt*
is void of the rapidly fluctuating component, the difference

|*gt* - *g’t*| would be small compared
with |*ut* - *u”t*
(= *zt*, say)| such that *u’t* would be approximately
equal to *zt*. Hence, letting *k* (an odd positive integer)
be the order of the moving-average transformation, the autocorrelation function
*ru’u’*(*l*) would be approximated by *rzz*(*l*)
whose theoretical function is readily shown to be

|  |  |  |
| --- | --- | --- |
| *rzz*(*l*) = - (*k* + *l*)/*k*(*k* - 1), | 0 < *l* £ (*k* - 1)/2 |  |
|  |  |  |
| = (*k* - *l*)/*k*(*k* - 1), | (*k* - 1)/2 < *l* < *k* |  |
|  |  |  |
| = 0, | *k* < *l*. | (A.4) |

 For
*k* = 5, *rzz*(1) = - 0.3, *rzz*(2)
= - 0.35, *rzz*(3) = 0.1, *rzz*(4)
= 0.05, and *rzz*(*l*
³ 5) = 0, as in the *ru’u’*(*l*)
based on the length 50, although for length 4000 only the *ru’u’*(2)
is distinct. The tendency for *ru’u’*(2) to be distinctly negative
shows up in the cross-correlation function *ru’v’*(*l*)
(Fig. 7, middle column) that tends to exhibit significant spikes at lags other
than 0.

The results (A.4) show that *rzz*(*l*)
tends to zero for all *l* as the order *k* increases, apparently suggesting
that the higher the order *k*, the better *ru’v’*(*l*)
approximates *ruv*(*l*). This is true when *gt*
is linear, or flat, across all *t*. Otherwise, *g’t* would
over-smooth *gt* sooner or later as *k* increases, resulting
in the difference (*gt*  - *g’t*) to increase in variance. Conversely, too
low an order results in an under-smoothing that also results in an increase
in variance. Thus, there must be an optimal order at which the variance of the
difference (*gt*  -
*g’t*) is minimized. Delving further into this subject is beyond
the present scope. However, a graphical inspection (cf. Fig. 6a) would probably
be adequate in practice.

---

  
[Back to M075-010]
