# Supplementary material
Source: publisher figshare collection journal article supplement (https://wiley.figshare.com/articles/dataset/_/3573936)
Supplement: Supplementary file 1 [file 1 › appendix-B.pdf]

## Ecological Archives M075-010-A2

### T. Royama. 2005. Moran effect on nonlinear population processes. *Ecological Monographs* 75:277–293.

Appendix B. Autocorrelation for  $u'_t$ , an estimator of  $u_t$  by the moving-average method. A [pdf file](#) of this appendix is also available.

Figure A2 (see [Appendix A](#)) shows the sample autocorrelation functions,  $r_{uu}(l)$  and  $r_{u'u'}(l)$ , for the density-independent influence  $u_t$  and its estimator  $u'_t$  (Fig. 6b). The  $r_{uu}(l)$ , as samples of  $r_{uu}(l) \circ 0$ ,  $l > 0$ , are insignificantly different from zero at all lags shown, whereas the  $r_{u'u'}(l)$  exhibit a significant negative spike at lag 2, which can be explained as follows.

Consider that the series  $\{R_t\}$  is made up of two components: a low-frequency cycle ( $g_t$ , say) due to the autocorrelated density-dependent process and a rapid fluctuation (about the cycle) due to the density-independent influence  $u_t$  with no autocorrelation. Thus, we may write

$$R_t = g_t + u_t. \quad (\text{A.2})$$

After the moving-average transformation on both sides of (A.2), we have

$$R'_t = g'_t + u''_t \quad (\text{A.3})$$

in which the single and double primes indicate the moving-average transformations of the respective letters in Eq. A.2. Recalling the definition  $u'_t = R_t - R'_t$  in the main text, the difference (A.2) - (A.3) yields

$$g_t - g'_t + u_t - u''_t = u'_t.$$

Now that, by assumption,  $g_t$  is void of the rapidly fluctuating component, the difference

$|g_t - g'_t|$  would be small compared with  $|u_t - u''_t (= z_t, \text{ say})|$  such that  $u'_t$  would be approximately equal to  $z_t$ . Hence, letting  $k$  (an odd positive integer) be the order of the moving-average transformation, the autocorrelation function  $r_{u'u'}(l)$  would be approximated by  $r_{zz}(l)$  whose theoretical function is readily shown to be

$$\begin{aligned} r_{zz}(l) &= -(k+l)/k(k-1), & 0 < l \leq (k-1)/2 \\ &= (k-l)/k(k-1), & (k-1)/2 < l < k \\ &= 0, & k < l. \end{aligned} \quad (\text{A.4})$$

For  $k = 5$ ,  $r_{zz}(1) = -0.3$ ,  $r_{zz}(2) = -0.35$ ,  $r_{zz}(3) = 0.1$ ,  $r_{zz}(4) = 0.05$ , and  $r_{zz}(l \geq 5) = 0$ , as in the  $r_{u'u'}(l)$  based on the length 50, although for length 4000 only the  $r_{u'u'}(2)$  is distinct. The tendency for  $r_{u'u'}(2)$  to be distinctly negative shows up in the cross-correlation function  $r_{u'v'}(l)$  (Fig. 7, middle column) that tends to exhibit significant spikes at lags other than 0.

The results (A.4) show that  $r_{zz}(l)$  tends to zero for all  $l$  as the order  $k$  increases, apparently suggesting that the higher the order  $k$ , the better  $r_{u'v'}(l)$  approximates  $r_{uv}(l)$ . This is true when  $g_t$  is linear, or flat, across all  $t$ . Otherwise,  $g'_t$  would over-smooth  $g_t$  sooner or later as  $k$  increases, resulting in the difference  $(g_t - g'_t)$  to

increase in variance. Conversely, too low an order results in an under-smoothing that also results in an increase in variance. Thus, there must be an optimal order at which the variance of the difference ( $g_t - g'_t$ ) is minimized. Delving further into this subject is beyond the present scope. However, a graphical inspection (cf. Fig. 6a) would probably be adequate in practice.

---

[\[Back to M075-010\]](#)
